# Supplementary figures and images for: Movement initiation and grasp representation in premotor and primary motor cortex mirror neurons
Source: eLife journal article supplement (doi:10.7554/elife.54139), 2020-07-06

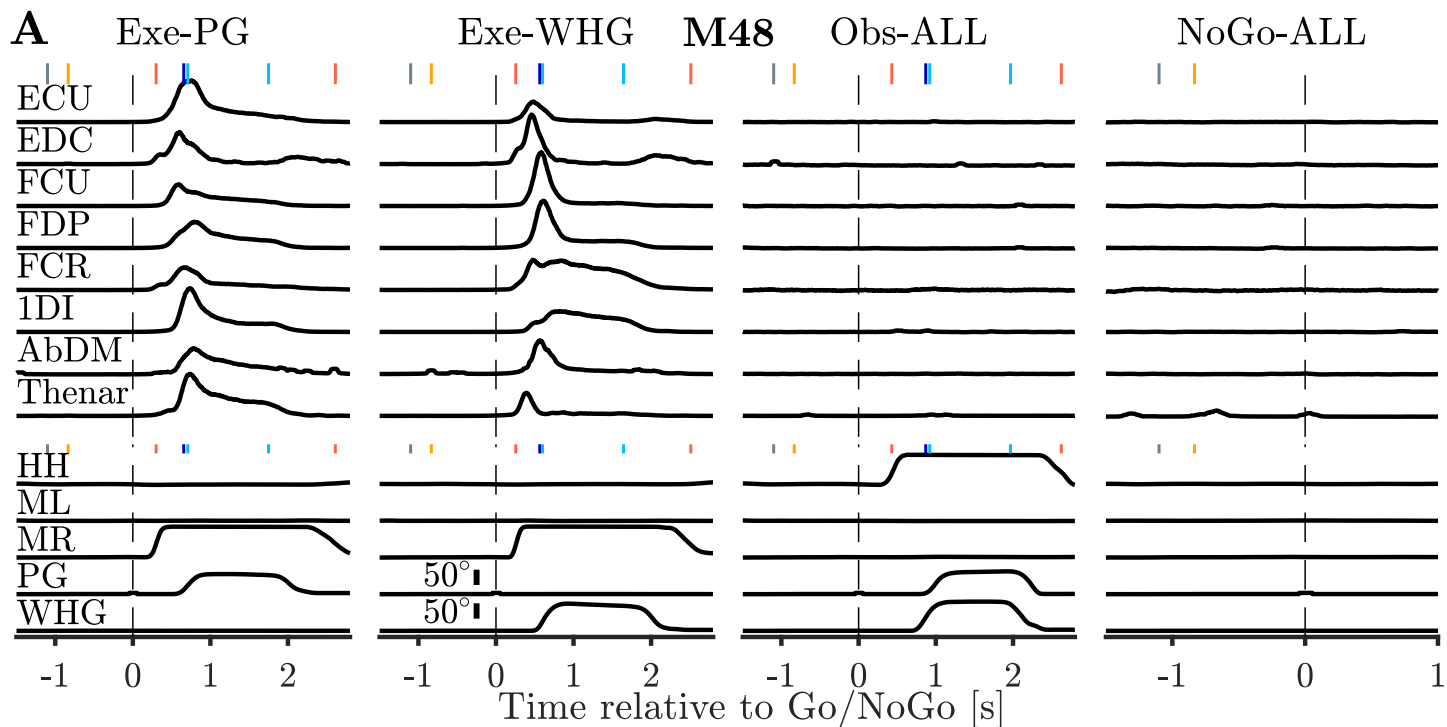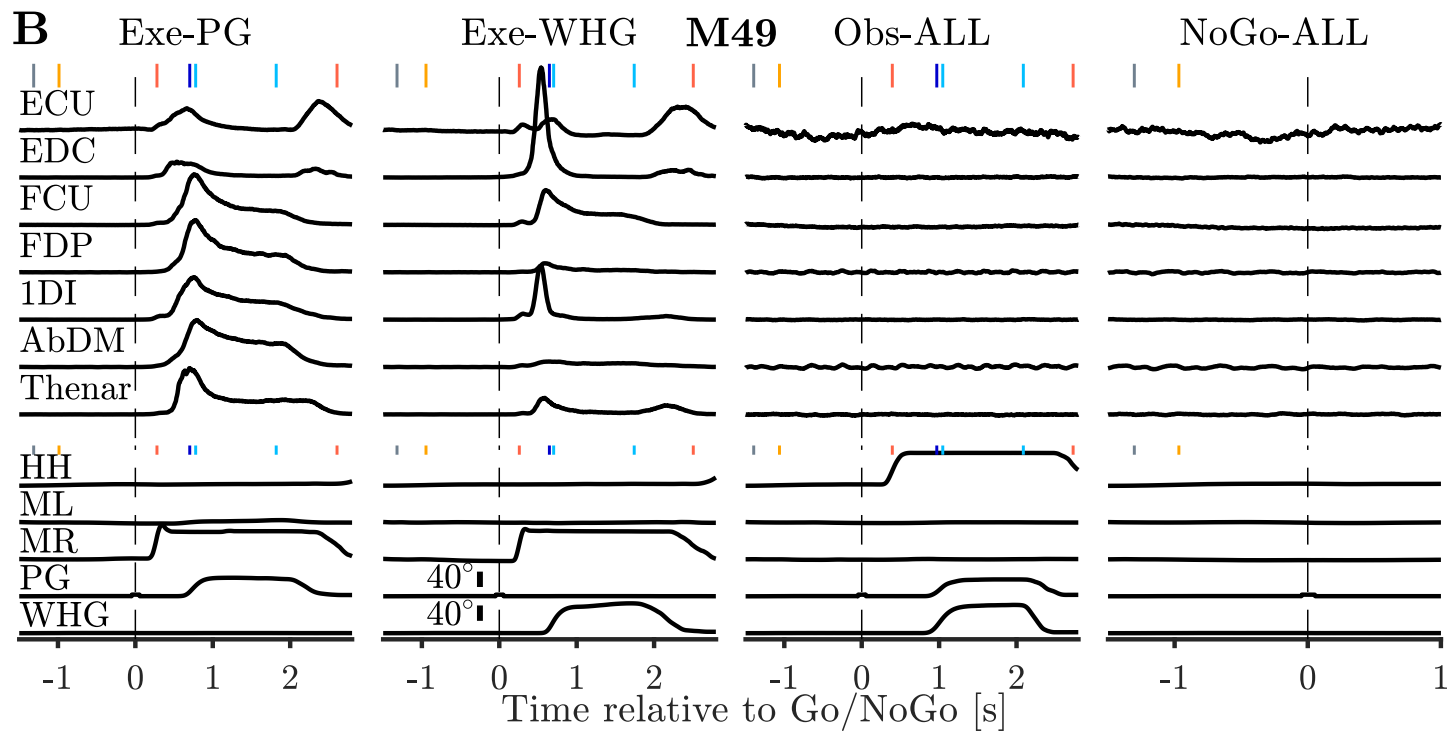

Supplement: supp [file elife_poa_e54139_Figure_2_figure_supplement_1.pdf › elife_poa_e54139_Figure_2_figure_supplement_1.pdf]

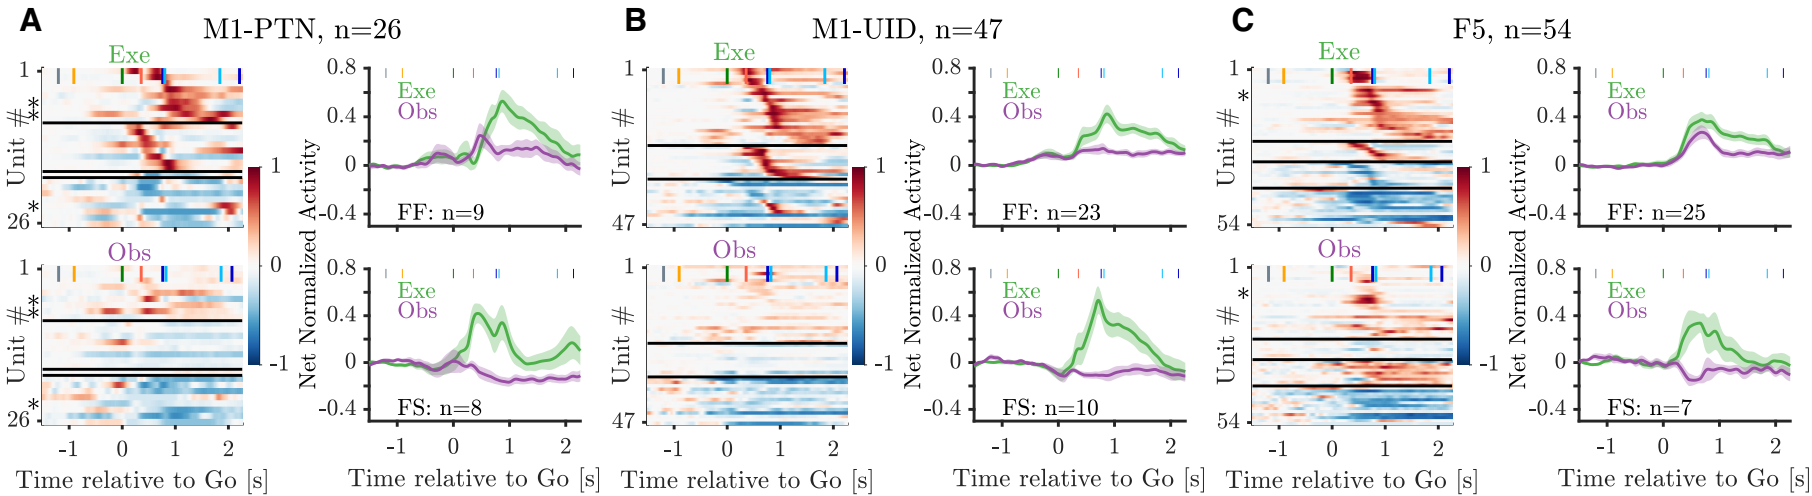

Supplement: supp [file elife_poa_e54139_Figure_5_figure_supplement_1.pdf › elife_poa_e54139_Figure_5_figure_supplement_1.pdf]

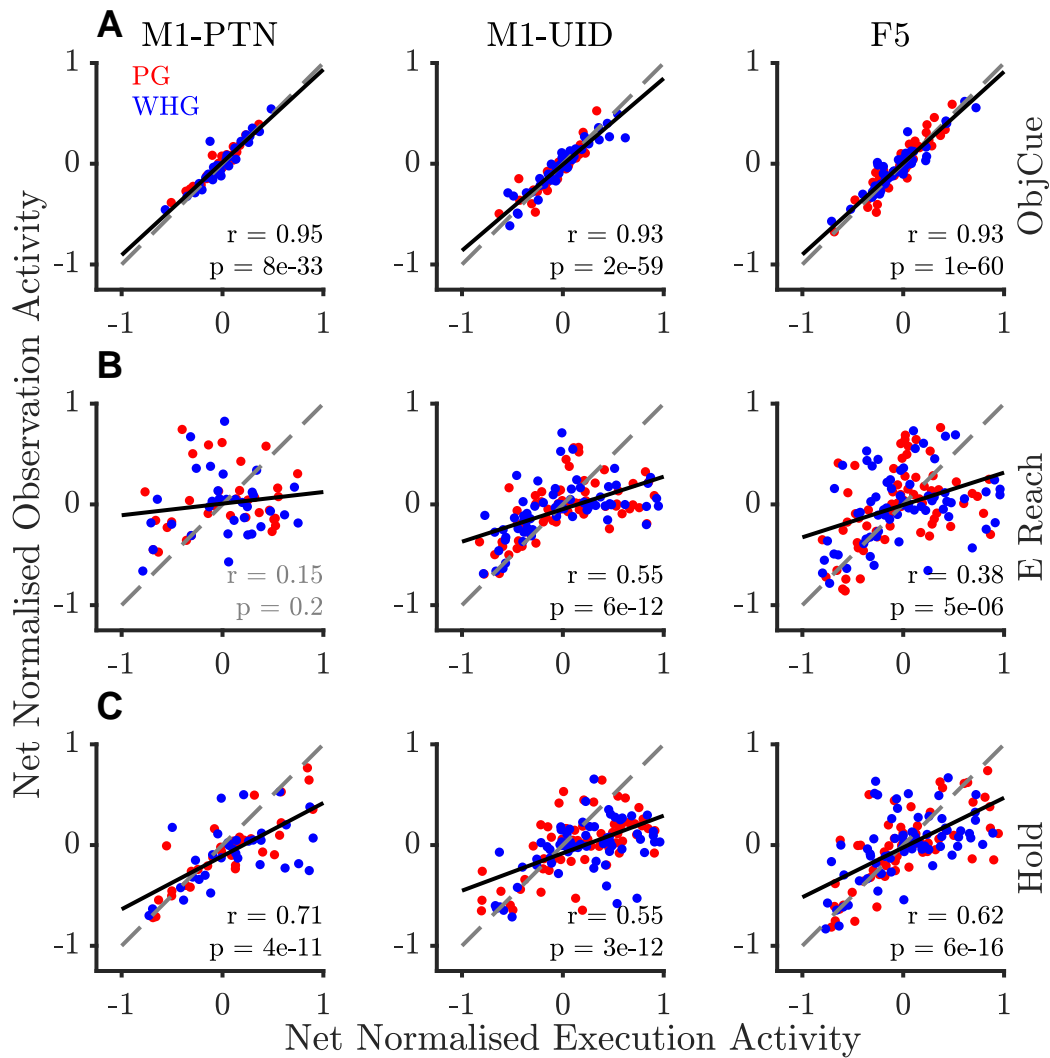

Supplement: supp [file elife_poa_e54139_Figure_6_figure_supplement_1.pdf › elife_poa_e54139_Figure_6_figure_supplement_1.pdf]

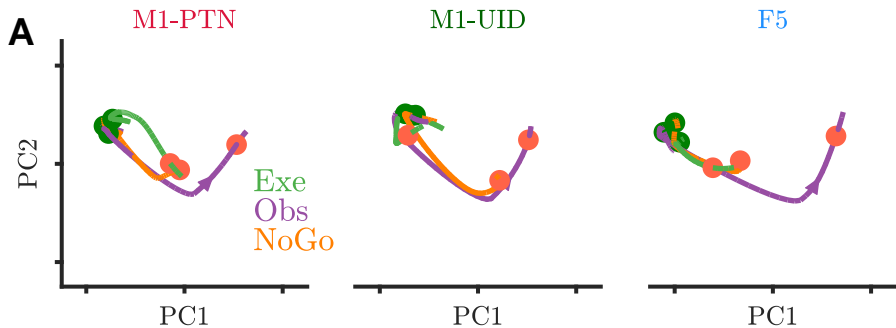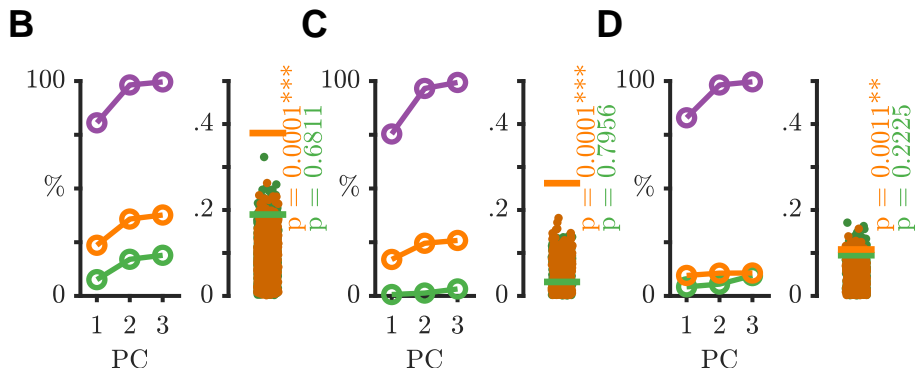

Supplement: supp [file elife_poa_e54139_Figure_9_figure_supplement_1.pdf › elife_poa_e54139_Figure_9_figure_supplement_1.pdf]
